# Supplementary material for: A novel synthesis of ultra thin graphene sheets for energy storage applications using malonic acid as a reducing agent
Source: Royal Society of Chemistry journal article supplement (doi:10.1039/c4ta04986a), 2014-01-01
Supplement: c4ta04986a1.pdf [file c4ta04986a1.pdf]

## Electronic Supplementary Information

### **A novel synthesis of ultra thin graphene sheets for energy storage applications using malonic acid as a reducing agent**

**Anil Kumar and Mahima Khandelwal**

*Department of Chemistry, Indian Institute of Technology Roorkee, Roorkee - 247667, India*

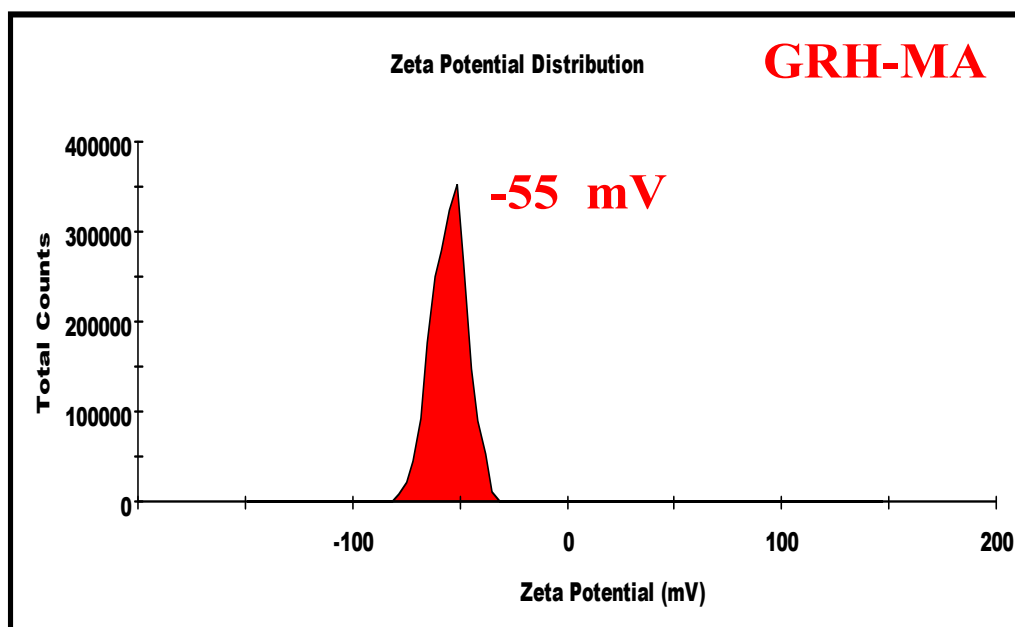

**Fig. S1 Zeta- potential of GRH-MA.**

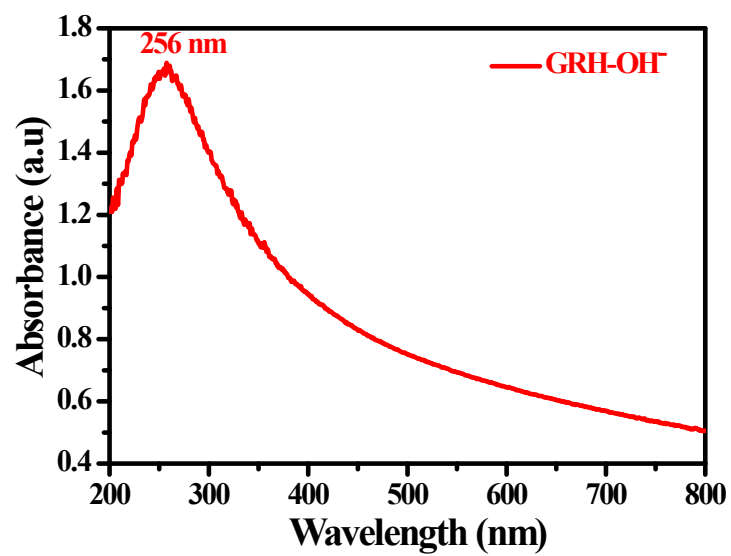

**Fig. S2 Optical absorption spectrum of GRH-OH<sup>-</sup> after 6 h of reaction.**

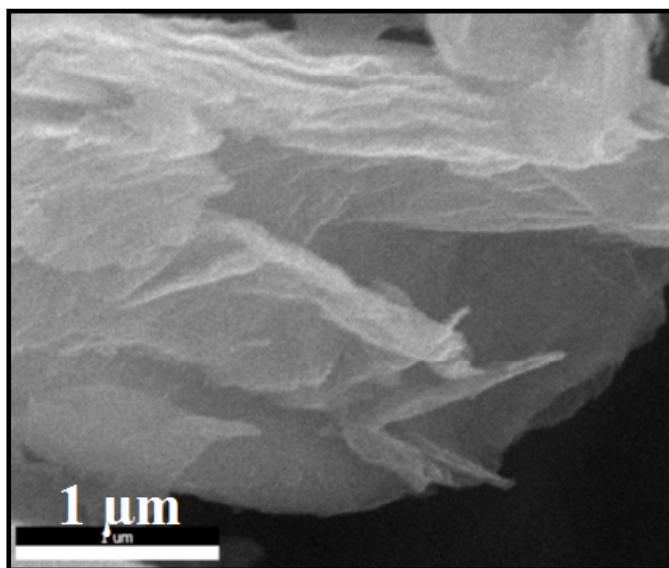

**Fig. S3 FE-SEM image of GRH-MA used for elemental mapping shown in Fig. 6 b'' and b''' at higher magnification.**

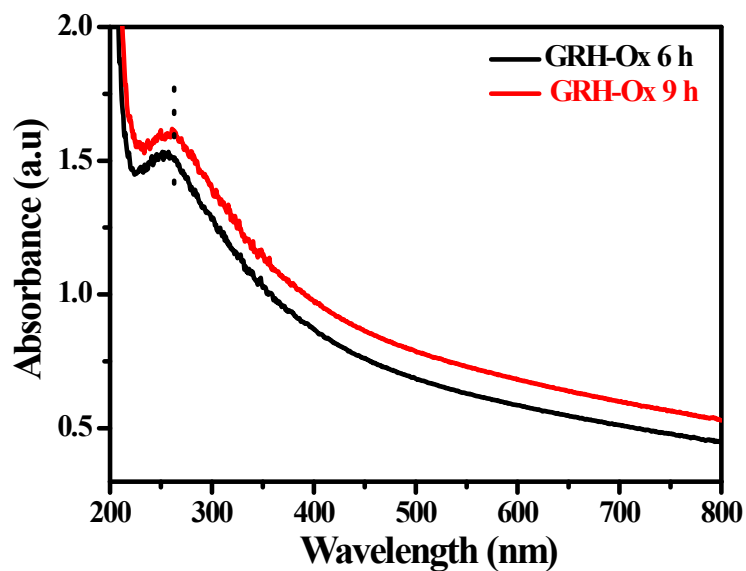

Fig. S4 Optical absorption spectrum of GRH-Ox after 6 and 9 h of reaction, respectively.

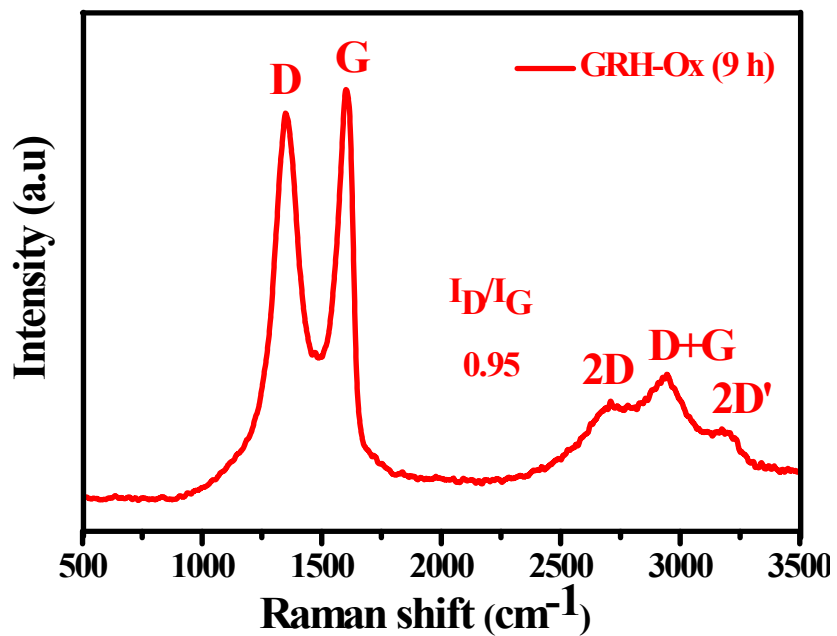

Fig. S5 Raman spectrum of GRH-Ox after 9 h of reaction.

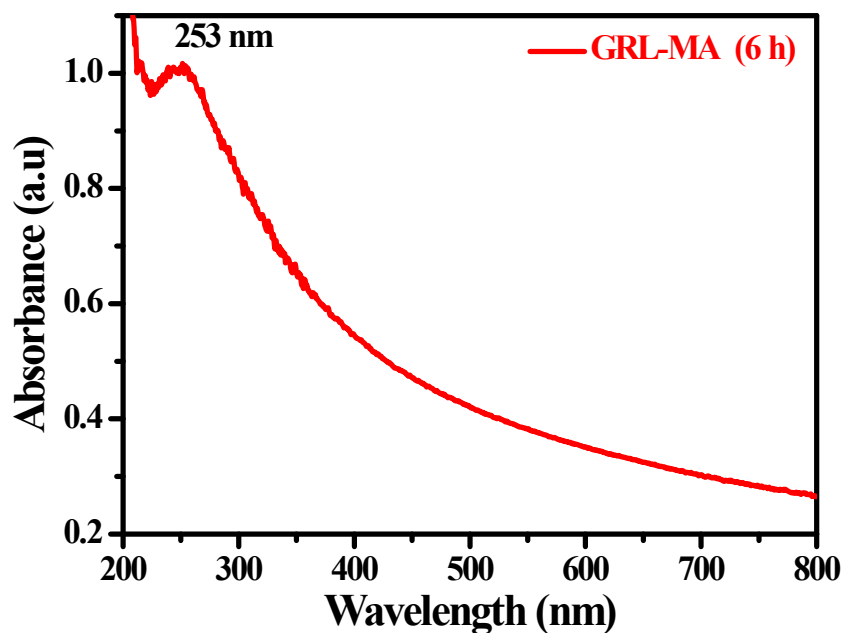

Fig. S6 Optical absorption spectrum of GRL-MA after 6 h of reaction.

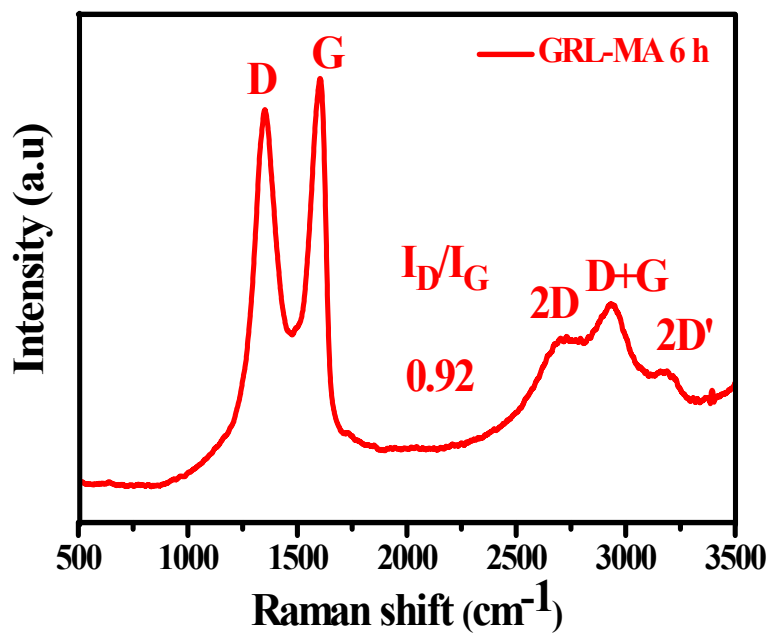

Fig. S7 Raman spectrum of GRL-MA after 6 h of reaction.

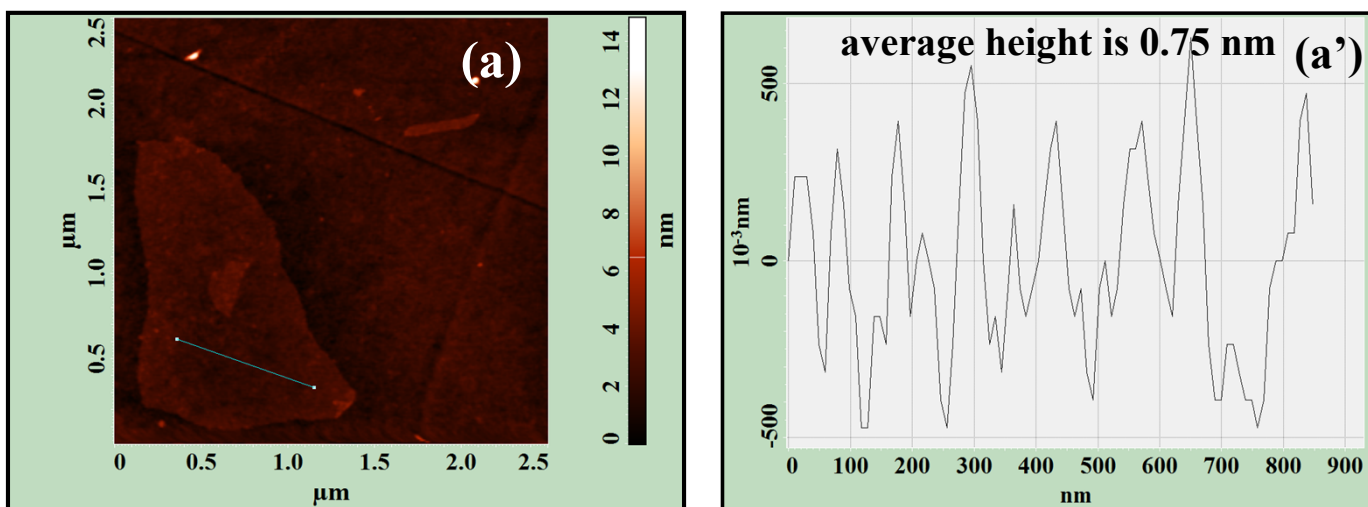

Fig. S8 AFM image and its height profile along a particular line of GRH-Ox (a,a').

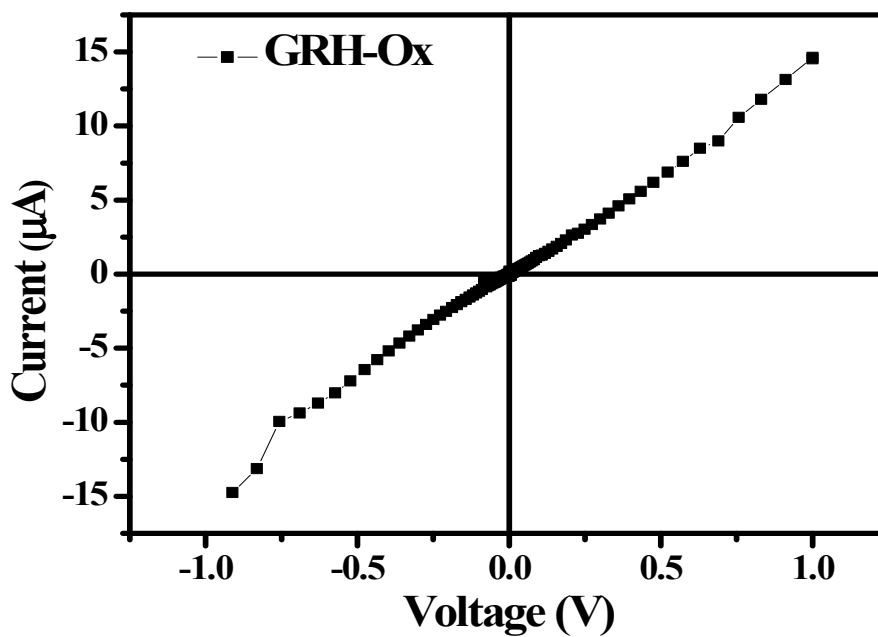

Fig. S9 I-V curve of GRH-Ox.

**Table S1 Raman spectral data of graphite, GO, GRH-MA and GRH-MA300.**

| <b>Raman shift</b> | <b>D band (cm<sup>-1</sup>)</b> | <b>G band (cm<sup>-1</sup>)</b> | <b>I<sub>D</sub>/I<sub>G</sub></b> |
|--------------------|---------------------------------|---------------------------------|------------------------------------|
| <b>Graphite</b>    | 1359                            | 1583                            | -                                  |
| <b>GO</b>          | 1356                            | 1606                            | 0.86                               |
| <b>GRH-MA</b>      | 1353                            | 1604                            | 0.97                               |
| <b>GRH-MA300</b>   | 1354                            | 1596                            | 0.93                               |

**Table S2 A comparison of the specific capacitance (C<sub>s</sub>) value of GRH-MA with the previously reported chemically reduced graphene(s) and some of the N-doped graphene(s).**

| <b>Reducing agents</b>                                                              | <b>Specific Capacitance (CV and GCD)</b>             | <b>Ref.</b>          |
|-------------------------------------------------------------------------------------|------------------------------------------------------|----------------------|
| <i>Malonic acid reduced GO</i>                                                      | <i>254 F/g at 1 A/g<br/>173 F/g at 100 mV/s</i>      | <i>Present study</i> |
| Microbial reduction of GO by <i>Shewanella</i>                                      | 117 F g <sup>-1</sup> at 1 A g <sup>-1</sup>         | <b>S1</b>            |
| Trigol reduced GO                                                                   | 130 F g <sup>-1</sup> at 1 A /g<br>106.3 at 100 mV/s | <b>S2</b>            |
| Caffeic acid reduced GO                                                             | 136 F/g at 1 A/g<br>96 F/g at 100 mV/s               | <b>S3</b>            |
| Double microwave assisted exfoliations of expandable graphite                       | 189 F/g at 1 A/g<br>164 F/g at 100 mV/s              | <b>S4</b>            |
| Dimethyl ketoxime reduced GO                                                        | 131 F/g at 100 mV/s                                  | <b>S5</b>            |
| Solvothermal process for the reduction of GO and introduction of primary amine      | 87.1 F/g at 100 mV/s                                 | <b>S6</b>            |
| Hydrazine monohydrate reduced GO                                                    | 133 F g <sup>-1</sup> at 1 A g <sup>-1</sup>         | <b>S7</b>            |
| Exfoliation of graphite flakes with the addition of melamine producing N- doped FLG | 227 F/g at 1 A/g                                     | <b>S7</b>            |

## References:

- S1. G. Wang, F. Qian, C. W. Saltikov, Y. Jiao and Y. Li, *Nano Res.*, 2011, **4**, 563.
- S2. D. Mhamane, S. M. Unni, A. Suryawanshi, O. Game, C. Rode, B. Hannoyer, S. Kurungot and S. Ogale, *J. Mater. Chem.*, 2012, **22**, 11140.
- S3. Z. Bo, X. Shuai, S. Mao, H. Yang, J. Qian, J. Chen, J. Yan and K. Cen, *Sci. Rep.*, 2014, **4**, 4684.
- S4. X. Liu, D. Zhan, D. Chao, B. Cao, J. Yin, J. Zhao, Y. Li, J. Lin and Z. Shen, *J. Mater. Chem. A*, 2014, **2**, 12166.
- S5. P. Su, H.-L. Guo, L. Tian and S.-K. Ning, *Carbon*, 2012, **50**, 5351.
- S6. L. Lai, L. Chen, D. Zhan, L. Sun, J. Liu, S. H. Lim, C. K. Poh, Z. Shen and J. Lin, *Carbon*, 2011, **49**, 3250.
- S7. N. Xiao, D. Lau, W. Shi, J. Zhu, X. Dong, H. H. Hng and Q. Yan, *Carbon*, 2013, **57**, 184.
